# Supplementary material
Source: publisher figshare collection journal article supplement (https://future-science-group.figshare.com/ndownloader/files/34444847)
Supplement: Supplementary file 1 [file 34444847]

Table S1. List of primers used in the study

| **ID** | **Position** | **Forward-primer sequence (TM/GC%) 1** | **Reverse-primer sequence (TM/GC%)** | **Amplicon size (bp) 2** |
| --- | --- | --- | --- | --- |
| P1 | 1..1209 | accaaacagagaatccgtaagttac (56℃/40%) | ccaagtctccagaatgatgtgc (59℃/50%) | 1209 |
| P2 | 1117..2446 | ctttgccatgggtatggcatca (58℃/50%) | cattgtccatgatatgctgtgt (55℃/41%) | 1330 |
| P3 | 2360..3714 | aaacagtctggaaagaccgc (57℃/50%) | ctacagctttgcagcacttg (56℃/50%) | 1355 |
| P4 | 3592..4649 | agaccttattgagctggcaag (57℃/48%) | gcctgccatcaatggagt (57℃/56%) | 1058 |
| P5 | 4534..5500 | caggtgcaagatgggctcca (56℃/40%) | gacaagtgccgaggcaaatc (58℃/55%) | 967 |
| P6 | 5399..6525 | caggtaactctaccttcagtcg (55℃/50%) | Agccaaggtcactactgtt (55℃/47%) | 1127 |
| P7 | 6389..7444 | ttcaccgacaacagtcctca (56℃/50%) | ggcatgtgtcattgtatcgc (56℃/50%) | 1056 |
| P8 | 7324..8531 | ggatcttttattgacagccgc (56℃/48%) | Gaatgaggtggtcgaagtcac (57℃/52%) | 1208 |
| P9 | 8422..9744 | cctaccagagtcacacctgtc (59℃/47%) | Catggctcaaattcaagtgca (55℃/43%) | 1323 |
| P10 | 9592..10940 | cagaaagaagaatgcaggtgtg (56℃/45%) | ctacagtagaggcaatgttggc (57℃/50%) | 1349 |
| P11 | 10831..12154 | tggagcaatcctcagtcaagtc (57℃/50%) | ggacagtaaccgaagatactctaag (56℃/44%) | 1324 |
| P12 | 12041..13269 | gcatcatccgtgttgatctg (55℃/50%) | aatggtttcacagcatccgac (58℃/48%) | 1229 |
| P13 | 13161..14391 | cggtactctttgctacaacaag (55℃/45%) | cgctgtgaggtgaataacctg (57℃/52%) | 1231 |
| P14 | 14277..15186 | ggcctacatttgtacatgaggtg (57℃/48%) | Accaaacaaagatttggtgaatgac (56℃/36%) | 910 |

1 Given result seen in Figure 3

2 TM: predicted melt temperature; GC%: GC content
